# Supplementary material for: Exposure to “Exergames” Increases Older Adults’ Perception of the Usefulness of Technology for Improving Health and Physical Activity: A Pilot Study
Source: PubMed Central journal article supplement (PMC4704928; doi:10.2196/games.4275), 2015-11-27

**Multimedia Appendix 1.**

(A) Screenshot of intervention for training postural balance.

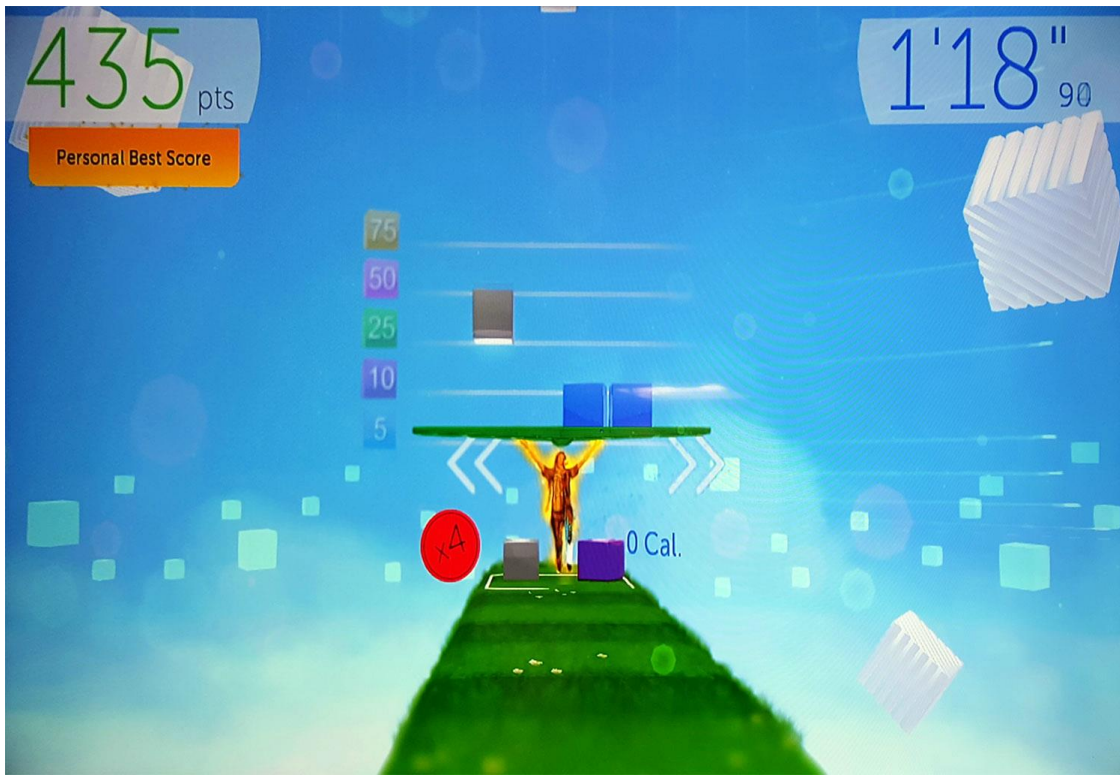

(B) Using the game for training postural balance.

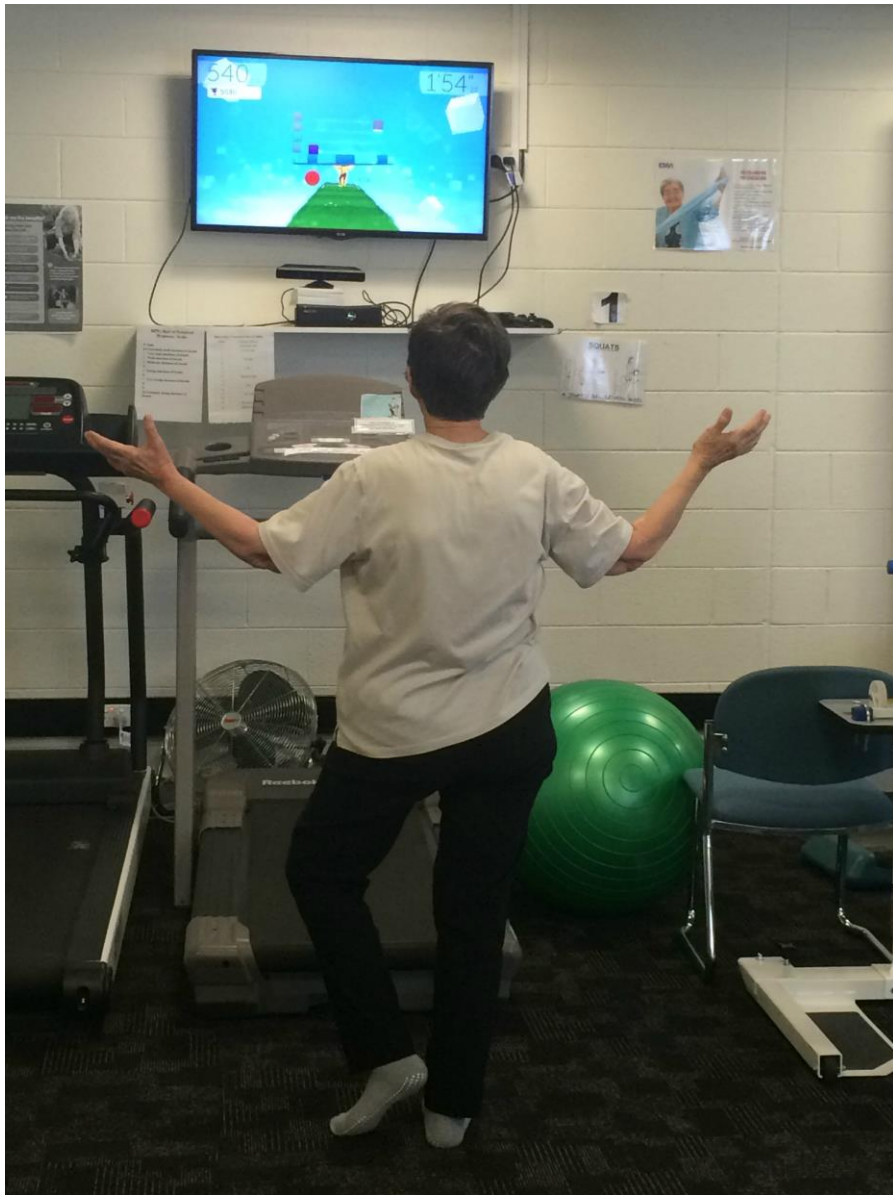

Supplement: games_v3i2e8_app1.pdf [file games_v3i2e8_app1.pdf]
